# Supplementary material for: Six stroma-based RNA markers diagnostic for prostate cancer in European-Americans validated at the RNA and protein levels in patients in China
Source: PubMed Central journal article supplement (PMC4599305; doi:10.18632/oncotarget.4430), 2015-06-19
Supplement: oncotarget-06-16757-s001.pdf [file oncotarget-06-16757-s001.pdf]

# Six stroma-based RNA markers diagnostic for prostate cancer in European-Americans validated at the RNA and protein levels in patients in China

## Supplementary Material

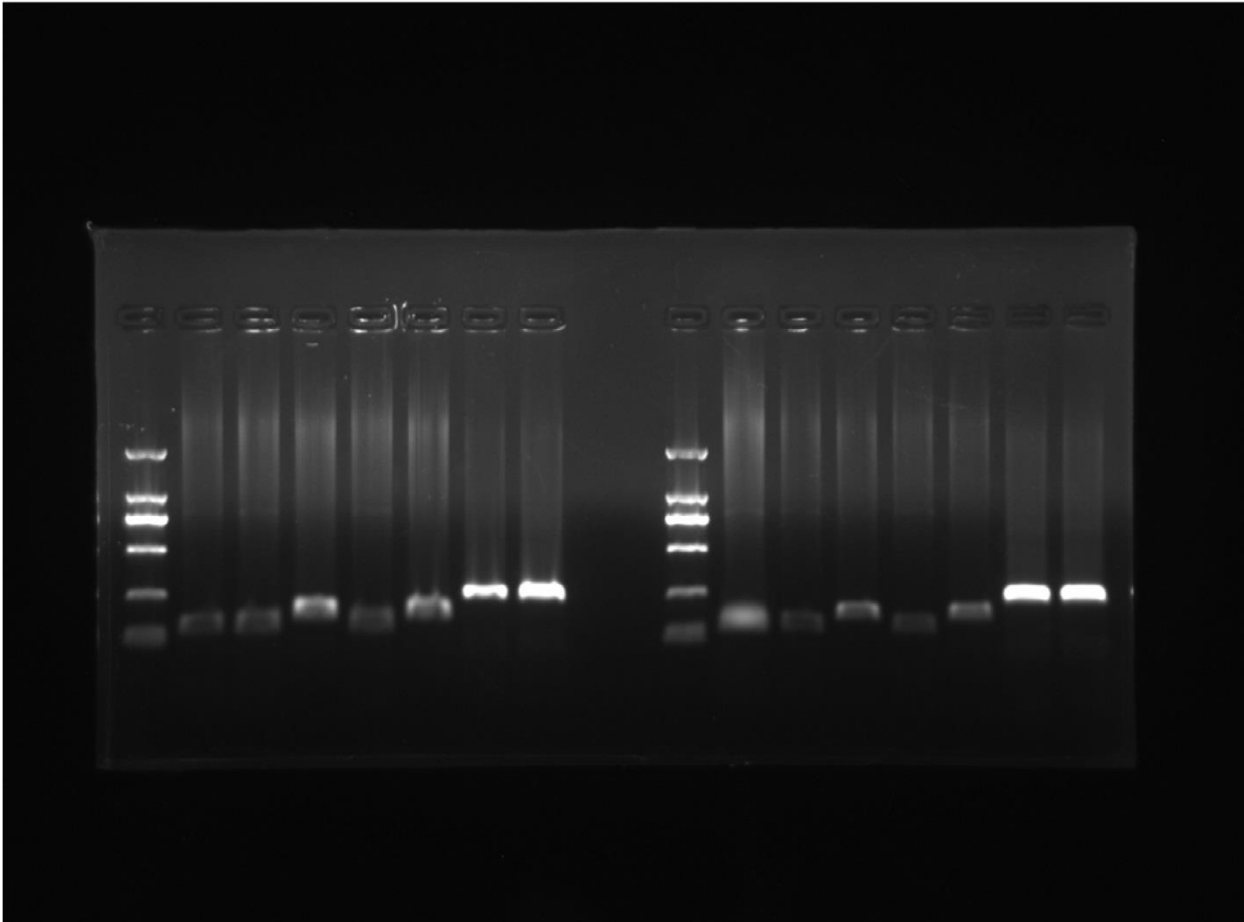

Figure S1: Original images for the PCR agarose gel. Left panel is normal stroma (NS) and right panel is Tumor adjacent stroma (TS).

Table S1: Primer List for the six selected genes.

| Gene          | Direction | Primer                   | PCR production length |
|---------------|-----------|--------------------------|-----------------------|
| <i>CAV1</i>   | F         | CAGTGCATCAGCCGTGTCTA     | 103                   |
|               | R         | TCTGCAAGTTGATGCGGACA     |                       |
| <i>COL4A2</i> | F         | CATCACACCCCCTTCCAACA     | 80                    |
|               | R         | CCCGATAACCTTTCAGGCCA     |                       |
| <i>HSPB1</i>  | F         | AGCTGACGGTCAAGACCAAG     | 224                   |
|               | R         | TGGGATGGTGATCTCGTTGG     |                       |
| <i>ITGB3</i>  | F         | CCCAGATGCCTGCACCTTTA     | 110                   |
|               | R         | ACTCAATCTCGTCACGGCAG     |                       |
| <i>MAP1A</i>  | F         | GAGAGGCTTCCTCCTACACC     | 186                   |
|               | R         | GTCTCCCCCAGGCTCTAAAC     |                       |
| <i>MCAM</i>   | F         | GAAGCATGGGGCTTCCCAG      | 234                   |
|               | R         | GCACACGGAAGATGAGCGTC     |                       |
| <i>GAPDH</i>  | F         | CATGGGTGTGAACCATGAGAAGTA | 239                   |
|               | R         | CAGTAGAGGCAGGGATGATGTTCT |                       |
